# Supplementary material for: Characteristics of atmospheric mercury in East China: implication on sources and formation of mercury species over a regional transport intersection zone
Source: Copernicus journal article supplement (doi:10.5194/acp-2018-1164), 2018-12-04
Supplement: Supplementary file 1 [file acp-2018-1164-supplement.pdf]

## ***Supplemental Materials***

### **Characteristics of atmospheric mercury in East China: implication on sources and formation of mercury species over a regional transport intersection zone**

Xiaofei Qin<sup>1</sup>, Xiaohao Wang<sup>2</sup>, Yijie Shi<sup>1</sup>, Guangyuan Yu<sup>1</sup>, Yanfen Lin<sup>2</sup>, Qingyan Fu<sup>2</sup>, Dongfang Wang<sup>2</sup>, Zhouqing Xie<sup>3</sup>, Congrui Deng<sup>1,\*</sup>, Kan Huang<sup>1,\*</sup>

*<sup>1</sup>Center for Atmospheric Chemistry Study, Shanghai Key Laboratory of Atmospheric Particle Pollution and Prevention (LAP<sup>3</sup>), Department of Environmental Science and Engineering, Fudan University, Shanghai, 200433 China*

*<sup>2</sup>Shanghai Environmental Monitoring Center, Shanghai, 200030 China*

*<sup>3</sup>School of Earth and Space Sciences, University of Science and Technology of China, Hefei, Anhui, 230026 China*

Correspondence: [congruideng@fudan.edu.cn](mailto:congruideng@fudan.edu.cn), [huangkan@fudan.edu.cn](mailto:huangkan@fudan.edu.cn)

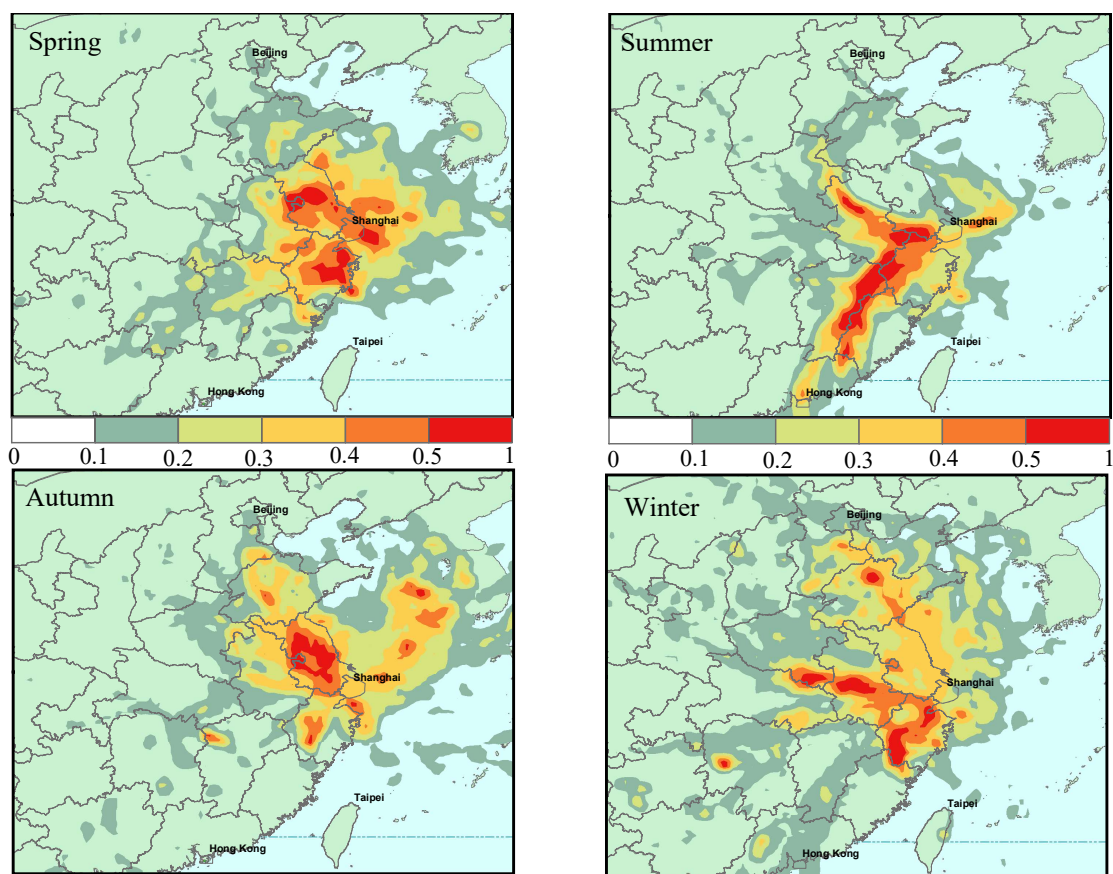

GEM

Figure S1. Potential source regions of seasonal GEM at the sampling site according to PSCF analysis.

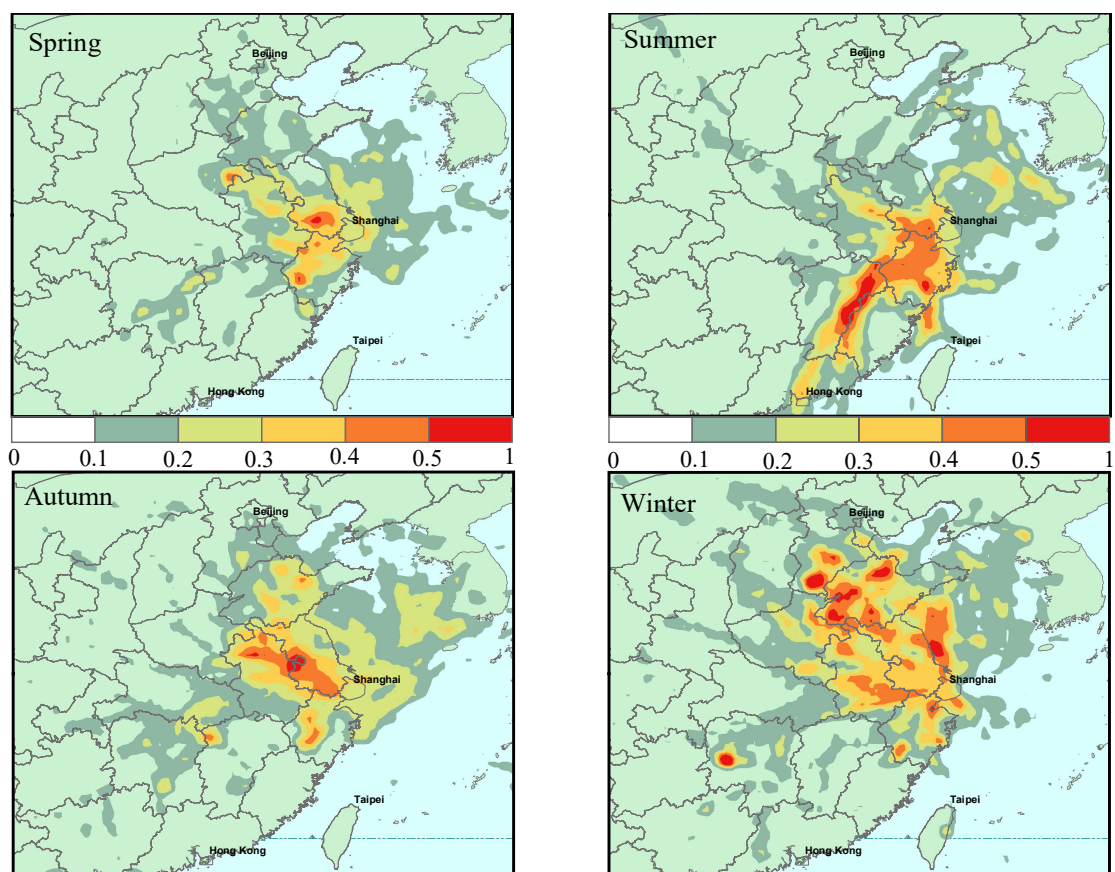

PBM

Figure S2. Potential source regions of seasonal PBM at the sampling site according to PSCF analysis.

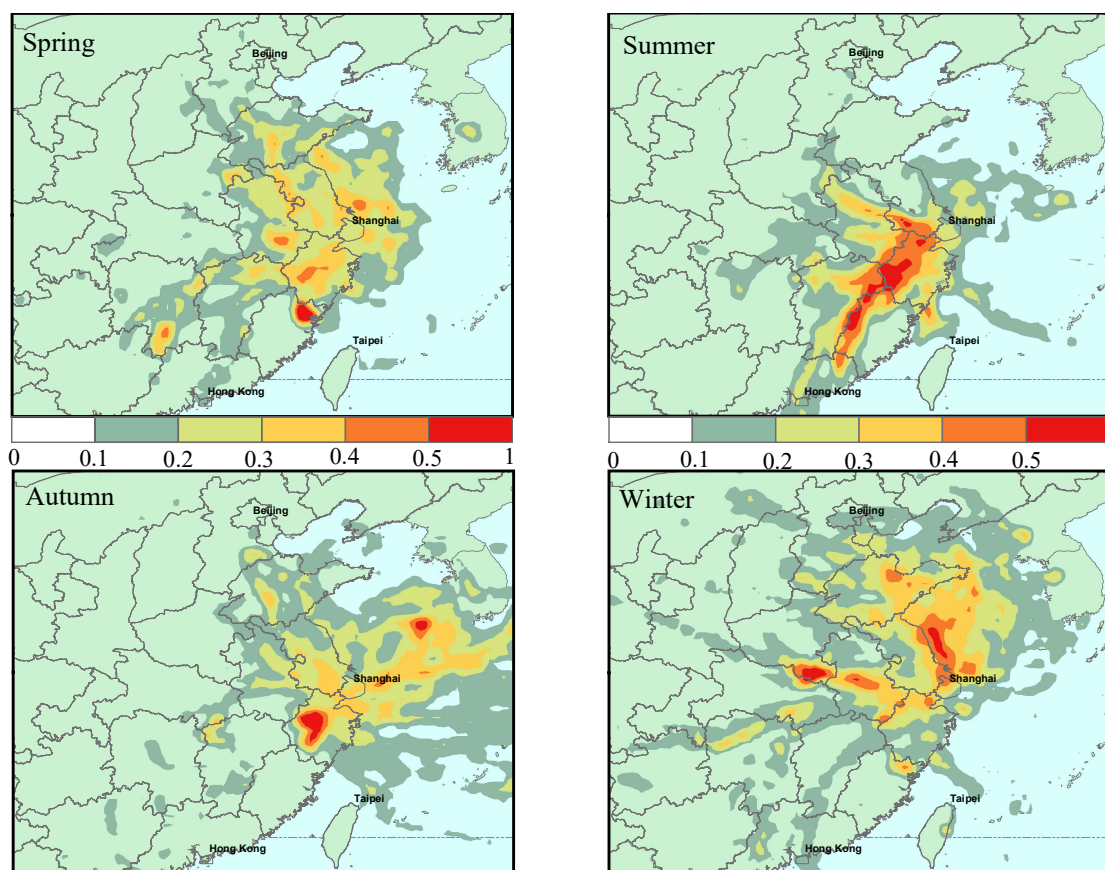

GOM

Figure S3. Potential source regions of seasonal GOM at the sampling site according to PSCF analysis.
